# Supplementary material for: Paediatric drugs trials in China
Source: PubMed Central journal article supplement — BMJ Paediatr Open. 2020 Mar 31;4(1):e000618. doi: 10.1136/bmjpo-2019-000618 (PMC7173953; doi:10.1136/bmjpo-2019-000618), 2020-03-31
Supplement: bmjpo-2019-000618.draft_revisions.pdf [file bmjpo-2019-000618.draft_revisions.pdf]

# BMJ Paediatrics Open

BMJ Paediatrics Open is committed to open peer review. As part of this commitment we make the peer review history of every article we publish publicly available.

When an article is published we post the peer reviewers' comments and the authors' responses online. We also post the versions of the paper that were used during peer review. These are the versions that the peer review comments apply to.

The versions of the paper that follow are the versions that were submitted during the peer review process. They are not the versions of record or the final published versions. They should not be cited or distributed as the published version of this manuscript.

BMJ Paediatrics Open is an open access journal and the full, final, typeset and author-corrected version of record of the manuscript is available on our site with no access controls, subscription charges or pay-per-view fees (<http://bmjpaedsopen.bmj.com>).

If you have any questions on BMJ Paediatrics Open's open peer review process please email [info.bmjpo@bmj.com](mailto:info.bmjpo@bmj.com)

# BMJ Paediatrics Open

## Pediatric Drugs Clinical Trials in China

|                               |                                                                                                                                  |
|-------------------------------|----------------------------------------------------------------------------------------------------------------------------------|
| Journal:                      | <i>BMJ Paediatrics Open</i>                                                                                                      |
| Manuscript ID                 | bmjpo-2019-000618                                                                                                                |
| Article Type:                 | Original research                                                                                                                |
| Date Submitted by the Author: | 29-Nov-2019                                                                                                                      |
| Complete List of Authors:     | Hao, Guo-xiang<br>Yuan, Xiao-xiao<br>Guo, Wei<br>Quan, Xi-Yu<br>Qi, Xue-Jie<br>Wang, Tian-You<br>Zhao, Wei; Shandong University, |
| Keywords:                     | Paediatric Practice, Evidence Based Medicine                                                                                     |
|                               |                                                                                                                                  |

SCHOLARONE™  
Manuscripts

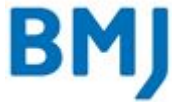

I, the Submitting Author has the right to grant and does grant on behalf of all authors of the Work (as defined in the below author licence), an exclusive licence and/or a non-exclusive licence for contributions from authors who are: i) UK Crown employees; ii) where BMJ has agreed a CC-BY licence shall apply, and/or iii) in accordance with the terms applicable for US Federal Government officers or employees acting as part of their official duties; on a worldwide, perpetual, irrevocable, royalty-free basis to BMJ Publishing Group Ltd ("BMJ") its licensees and where the relevant Journal is co-owned by BMJ to the co-owners of the Journal, to publish the Work in this journal and any other BMJ products and to exploit all rights, as set out in our [licence](#).

The Submitting Author accepts and understands that any supply made under these terms is made by BMJ to the Submitting Author unless you are acting as an employee on behalf of your employer or a postgraduate student of an affiliated institution which is paying any applicable article publishing charge ("APC") for Open Access articles. Where the Submitting Author wishes to make the Work available on an Open Access basis (and intends to pay the relevant APC), the terms of reuse of such Open Access shall be governed by a Creative Commons licence – details of these licences and which [Creative Commons](#) licence will apply to this Work are set out in our licence referred to above.

Other than as permitted in any relevant BMJ Author's Self Archiving Policies, I confirm this Work has not been accepted for publication elsewhere, is not being considered for publication elsewhere and does not duplicate material already published. I confirm all authors consent to publication of this Work and authorise the granting of this licence.

# Pediatric Drugs Clinical Trials in China

**Running title:** Pediatric Clinical Trials in China

Guo-Xiang Hao<sup>1\*</sup>, Xiao-Xiao Yuan<sup>1\*</sup>, Wei Guo<sup>1</sup>, Xi-Yu Quan<sup>1</sup>, Xue-Jie Qi<sup>1</sup>,  
Tian-You Wang<sup>2,3</sup>, Wei Zhao<sup>1,4#</sup>

\* The first two authors contributed equally

1. Department of Clinical Pharmacy, School of Pharmaceutical Sciences, Shandong University, Jinan, China
2. Beijing Key Laboratory of Pediatric Hematology Oncology, National Key Discipline of Pediatrics (Capital Medical University), Key Laboratory of Major Diseases in Children, Ministry of Education
3. Hematology Oncology Center, Beijing Children's Hospital, Capital Medical University, National Center for Children's Health, Beijing, China
4. Department of Pharmacy, Shandong Provincial Qianfoshan Hospital, the First Hospital Affiliated with Shandong First Medical University, Jinan, China

Address for correspondence:

Prof Dr Wei Zhao

Department of Clinical Pharmacy, School of Pharmaceutical sciences, Shandong University, Jinan, 250012, China

Tel: 0086-531-88383308; fax: 0086-531-88383308

E-mail: zhao4wei2@hotmail.com

Manuscript: 1089 words; References: 9; Figure: 2; Table: 2.

## Abstract

### Objective

Clinical trials of children's drugs are of great significance to rational drug use in children. However, clinical trials of pediatric drugs in China are facing complex challenges. At present, the investigation on the registration status of pediatric clinical trials in China is lacking, and relevant research is urgently needed to understand the impact of drug policy on pediatric drug development in China.

### Methods

The advanced retrieval function is used to retrieve clinical trials data in the Clinical Trial.gov and Chinese Clinical Trial Registry databases. Fifteen key items were analyzed to describe trial characteristics.

### Results

As of April 22, 2019, a total of 1388 clinical trials of pediatric drugs were registered in China. The number of pediatric drug trials registered grew steadily over time. Most clinical trials were post-marketing (n=800, 57.6%), single-center (n=1045, 75.3%), intervention studies (n=1161, 83.6%) without blinded methods (1169, 84.2%) and funded by non-profit organizations (n=838, 60.4%). The number of clinical trials for anti-infective drugs (n=291, 21.0%) and blood system drugs (n=198, 14.3%) is the largest.

### Conclusion

Pediatric drugs clinical trials in China made a significant progress in recent years. Innovative method and trial design optimization should be encouraged

1  
2  
3  
4 to accelerate pediatric clinical research. Pharmaceutical companies need to be  
5  
6 further stimulated to carry out more high-quality pediatric clinical trials with  
7  
8 support of pediatric drug legislation.  
9  
10

11 **Keywords:** Pediatrics, clinical trials, registration  
12  
13  
14  
15  
16  
17  
18  
19  
20  
21  
22  
23  
24  
25  
26  
27  
28  
29  
30  
31  
32  
33  
34  
35  
36  
37  
38  
39  
40  
41  
42  
43  
44  
45  
46  
47  
48  
49  
50  
51  
52  
53  
54  
55  
56  
57  
58  
59  
60

Confidential: For Review Only

**What is known about the subject?**

(i) Clinical trials of children's drugs are of great significance to rational drug use in children

(ii) Starting from 2003, children were formally included in the scope of clinical trials in the Good Clinical Practice (GCP) in China.

**What this study adds?**

(i) Pediatric drugs clinical trials in China made a significant progress in recent years.

(ii) Most pediatric drugs clinical trials in China were post-marketing, single-center, intervention studies without blinded methods and funded by non-profit organizations.

(iii) The number of pediatric drugs clinical trials for anti-infective drugs and blood system drugs is the largest in China.

## Introduction

The rational use of medicines in children is limited by the absence of scientific evidence and the off-label use of drugs is a critical issue in pediatric clinical practice, so the need for properly designed and conducted pediatric clinical trials has never been greater<sup>1,2</sup>. Insufficient pediatric clinical trials increase the risk of adverse drug reactions in children<sup>3</sup>. Due to the scant information on pediatric prescriptions, clinicians often prescribe unauthorized indications or dosage forms of medicines for children<sup>4,5</sup>. ADR monitoring data show that compared with 6.9% in adults, the ADR rate of children in China is 12.9%, of which 24.4% of neonates. According to World Health Organization (WHO) statistics in 2010, about 7.6 million children under the age of 5 die each year due to the lack of safe and effective drugs. The improper use of pediatric medicines will not only endanger children's health, but also bring misfortune to families and heavy burden to society.

Clinical trials are the golden standard for evaluating the safety and efficacy of drugs and producing evidence-based medical evidence. Registration of pediatric clinical trials is a preliminary plan for drug development in children. Pre-trial registration helps to reduce publication bias, selection bias, improve transparency of trials and make clinical trials conducted under public supervision, which is particularly important for the development of clinical trials for children<sup>6</sup>.



1  
2  
3  
4 The introduction of the Pediatric Regulation by the European Union, together  
5  
6 with the renewal of the Pediatric Rule by the US Food and Drug Administration  
7  
8 on the requirements for pediatric labeling made it mandatory for sponsors to  
9  
10 develop drugs for the pediatric population and promotes the pediatric drug trials  
11  
12 in Europe and US <sup>7 8</sup>. However, very little is known about the situation of  
13  
14 pediatric drug trials in other countries, particularly in China, home to nearly 300  
15  
16 millions children. In order to support the global research in pediatric drug  
17  
18 development and clarify the specific Chinese characteristics of pediatric drugs  
19  
20 trials, we analyzed the pediatric drug trials registered in China.  
21  
22  
23  
24  
25

## 26 27 28 **Methods**

### 29 30 31 **Design**

32  
33  
34 We investigate the current status of pediatric clinical trials in China through the  
35  
36 advanced retrieval functions of the Clinical Trial.gov (CTg) and Chinese Clinical  
37  
38 Trial Registry (ChiCTR) databases. The data deadline is April 22, 2019. The  
39  
40 key words of the ChiCTR are child, infant, enfant, newborn and adolescent (in  
41  
42 Chinese). Retrieve CTg qualification is Child (birth-18). The items enrolled into  
43  
44 the database include: registration number, year, mode of funding, type of  
45  
46 disease, medicine type, research stage, research design, sample size, number  
47  
48 of experimental groups, placebo group, blind method, implementation center,  
49  
50 child-specific, newborn-specific and participant age.  
51  
52  
53  
54  
55  
56  
57

### 58 59 **Patient and Public Involvement**

60

1  
2  
3  
4 Patients or the public were not involved in the design, or conduct, or reporting,  
5  
6 or dissemination of our research.  
7  
8

## 9 10 **Results**

11  
12 Among all (n=34574) Chinese clinical trials registered in the CTg and ChiCTR,  
13  
14 3368 trials (9.74%) involved the pediatric population. In CTg, the number of  
15  
16 pediatric clinical trials in China accounts for 10.3% of the total number of  
17  
18 pediatric clinical trials in the United States (n=2526/24488). A total of 1388  
19  
20 clinical trials (4.01%) were pediatric drug trials, including 466 in CHICTR and  
21  
22 922 in CTg.  
23  
24  
25  
26  
27  
28

29 In these pediatric drug trials, 547 trials were designed specifically for children  
30  
31 under the age of 18, including only 36 (0.259%) neonatal drug trials, while the  
32  
33 other 841 trials involved both children and adults. The number of registered  
34  
35 pediatric drugs clinical trials in China from 1983 to 2018 is shown in Figure 1.  
36  
37  
38

39  
40 Most pediatric drug trials were classified as post-marketing study (n=800,  
41  
42 57.6%), and were funded by non-profit organizations (n=838, 60.4%). The  
43  
44 industry sponsored only 437 (31.5%) trials. Around two thirds (n=924) of trials  
45  
46 were randomized and just about one eighth (n=168) involved a comparison with  
47  
48 a placebo. The majority of trials were single centre studies (n=1045, 75.3%)  
49  
50 and without blinded methods (n=1169, 84.2%). The number of interventional  
51  
52 studies (1161) far exceeds that of observational studies (227). About two-thirds  
53  
54 of clinical trials have a sample size of less than 300. The distribution of sample  
55  
56  
57  
58  
59  
60

size is shown in Table 1.

According to the taxonomy of the Anatomical Therapeutic Chemical (ATC) Classification system, all ATC classes were represented in 1388 pediatric drug trials, with a predominant for drugs targeting blood and blood forming organs, and for systemic anti-infectives (Table 2). There were 93 pediatric drug trials including Chinese traditional medicine.

## Discussions

In recent years, the Chinese government has adapted drug policy for children and paid more and more attention to the rational use of pediatric drugs and the development of pediatric clinical trials (Figure 2). Our results demonstrated for the first time the situation of pediatric drug trials in China. Consistent with the initiatives of promoting pediatric drug development in Europe and US, the pediatric drug trial in China made a significant progress after 2012.

Starting from 2003, children were formally included in the scope of clinical trials in the Good Clinical Practice (GCP) in China. This means that, like adults, children have the right to obtain evidence-based medical data for safe and effective treatment after clinical trials of new drugs under ethical and strict supervision. The development of pediatric clinical trials is conducive to protect children from invalid interventions. However, the proportion of children registered for clinical trials in China was 9.74% in this study, which was lower than that in Canada (22.4%), the United States (21.1%), the United Kingdom (18.5%), Japan (18.4%) and Germany (14.5%)<sup>9</sup>. Industry-sponsored trials are

1  
2  
3  
4 still limited in China and most of trials were still funded by public finding. This  
5  
6 might be one obvious reason for the lack of significant increase in last few years.

7  
8  
9 The pediatric drug legislation is urgently needed in China.

10  
11 This study shows that the proportion of observational research and  
12  
13 interventional research is about 1:5, which shows that interventional research  
14  
15 is more concerned and valued, and the content of observational research in  
16  
17 design and implementation is broader and more complex. Single-center, non-  
18  
19 blind research accounts for the majority of clinical trials,  
20  
21  
22

23  
24 Furthermore, about one hundred trials involved Chinese traditional medicine.

25  
26 This is a real change compared to the traditional idea, which considered  
27  
28 Chinese medicine as practical experiences. Indeed, the randomized clinical  
29  
30 trials and longer-term safety evaluation are urgently needed to develop  
31  
32 evidence-based therapy with Chinese traditional medicine in children.  
33  
34  
35  
36  
37  
38  
39

## 40 **Conclusions**

41  
42 Pediatric drugs clinical trials in China made a significant progress in recent  
43  
44 years. Innovative method and trial design optimization should be encouraged  
45  
46 to accelerate pediatric clinical research with joint efforts of regulator, scientist  
47  
48 and clinicians. Pharmaceutical companies need to be further stimulated to carry  
49  
50 out more high-quality clinical trials with support of pediatric drug legislation.  
51  
52  
53  
54  
55  
56  
57

58 **Author Contributions:** Prof Wei Zhao had full access to all of the data in the  
59  
60

1  
2  
3  
4 study and takes responsibility for the integrity of the data and the accuracy of  
5  
6 the data analysis. Study concept and design: Tian-You Wang, Wei Zhao;  
7  
8 Acquisition, analysis, and interpretation of data: All authors; Drafting of the  
9  
10 manuscript: Guo-Xiang Hao, Xiao-Xiao Yuan, Wei Zhao; Critical revision of the  
11  
12 manuscript: All authors. We plan to disseminate the results to study participants.  
13  
14  
15

16  
17 **Funding:** This work is supported by National Science and Technology Major  
18  
19 Projects for "Major New Drugs Innovation and Development"  
20  
21 (2017ZX09304029-002), Young Taishan Scholars Program of Shandong  
22  
23 Province, Qilu Young Scholars Program of Shandong University, National  
24  
25 Natural Science Foundation of China (81503163), Medical and Health Science  
26  
27 and Technology Development Program of Shandong Province  
28  
29 (2018WSB19010).  
30  
31  
32  
33

34  
35 **Competing interests:** None.  
36  
37  
38  
39  
40  
41  
42  
43  
44  
45  
46  
47  
48  
49  
50  
51  
52  
53  
54  
55  
56  
57  
58  
59  
60

## References

1. Conroy S, Choonara I, Impicciatore P, et al. Survey of unlicensed and off label drug use in paediatric wards in European countries. European Network for Drug Investigation in Children. *BMJ* 2000;320(7227):79-82. doi: 10.1136/bmj.320.7227.79 [published Online First: 2000/01/22]
2. Davis JM, Connor EM, Wood AJ. The need for rigorous evidence on medication use in preterm infants: is it time for a neonatal rule? *JAMA* 2012;308(14):1435-6. doi: 10.1001/jama.2012.12883 [published Online First: 2012/10/11]
3. Gore R, Chugh P, Tripathi C, et al. Pediatric Off-Label and Unlicensed Drug Use and Its Implications. 2017;12(1):18-25.
4. Napoleone E. Children and ADRs (Adverse Drug Reactions). *Ital J Pediatr* 2010;36:4. doi: 10.1186/1824-7288-36-4 [published Online First: 2010/02/26]
5. Waisel DB. Moral responsibility to attain thorough pediatric drug labeling. *Paediatr Anaesth* 2009;19(10):989-93. doi: 10.1111/j.1460-9592.2009.03113.x [published Online First: 2009/08/08]
6. Pasquali SK, Lam WK, Chiswell K, et al. Status of the pediatric clinical trials enterprise: an analysis of the US ClinicalTrials.gov registry. *Pediatrics* 2012;130(5):e1269-77. doi: 10.1542/peds.2011-3565 [published Online First: 2012/10/03]
7. Pansieri C, Bonati M, Choonara I, et al. Neonatal drug trials: impact of EU and US paediatric regulations. *Arch Dis Child Fetal Neonatal Ed* 2014;99(5):F438. doi: 10.1136/archdischild-2013-305900 [published Online First: 2014/05/06]
8. Turner MA, Catapano M, Hirschfeld S, et al. Paediatric drug development: the impact of evolving regulations. *Adv Drug Deliv Rev* 2014;73:2-13. doi: 10.1016/j.addr.2014.02.003 [published Online First: 2014/02/22]
9. LI J, Yan K, Kong YT, et al. A cross-sectional study of children clinical trials

1  
2  
3  
4  
5  
6  
7  
8  
9  
10  
11  
12  
13  
14  
15  
16  
17  
18  
19  
20  
21  
22  
23  
24  
25  
26  
27  
28  
29  
30  
31  
32  
33  
34  
35  
36  
37  
38  
39  
40  
41  
42  
43  
44  
45  
46  
47  
48  
49  
50  
51  
52  
53  
54  
55  
56  
57  
58  
59  
60

registration in the world based on ClinicalTrials. *Chin J Evid Based  
Pediatr* 2016;11(1):3-7.

Confidential: For Review Only

Table 1 Sample size in pediatric drug clinical trials

| sample size | No. of pediatric drug trials | Proportion (%) |
|-------------|------------------------------|----------------|
| 0-100       | 538                          | 38.7           |
| 101-200     | 264                          | 19.0           |
| 201-300     | 144                          | 10.4           |
| 301-400     | 90                           | 6.5            |
| 401-500     | 54                           | 3.9            |
| 501-1000    | 139                          | 10.0           |
| >1000       | 151                          | 10.9           |
| Unknown     | 8                            | 0.6            |
| Total       | 1388                         | 100.0          |



Table 2 Classes of drugs in pediatric drug trials

| Classes                                                         | No. of pediatric drug trials | Proportion (%) |
|-----------------------------------------------------------------|------------------------------|----------------|
| Alimentary tract and metabolism                                 | 55                           | 3.9            |
| Blood and blood forming organs                                  | 198                          | 14.3           |
| Cardiovascular system                                           | 100                          | 7.2            |
| Dermatologicals                                                 | 42                           | 3.0            |
| Genito urinary system and sex hormones                          | 51                           | 3.7            |
| Systemic hormonal preparations, excl. sex hormones and insulins | 72                           | 5.2            |
| Antiinfectives for systemic use                                 | 291                          | 21.0           |
| Antineoplastic and immunomodulating agents                      | 158                          | 11.4           |
| Musculo-skeletal system                                         | 36                           | 2.6            |
| Nervous system                                                  | 190                          | 13.7           |
| Antiparasitic products, insecticides and repellents             | 1                            | 0.1            |
| Respiratory system                                              | 124                          | 8.9            |
| Sensory organs                                                  | 38                           | 2.7            |
| Various                                                         | 32                           | 2.3            |
| Total                                                           | 1388                         | 100.0          |

**Figure legends**

Figure 1 The number of registered pediatric drugs clinical trials in China from 1983 to 2018

Figure 2 Policies on Clinical Trials of Pediatric Drugs in China

Confidential: For Review Only

1  
2  
3  
4  
5  
6  
7  
8  
9  
10  
11  
12  
13  
14  
15  
16  
17  
18  
19  
20  
21  
22  
23  
24  
25  
26  
27  
28  
29  
30  
31  
32  
33  
34  
35  
36  
37  
38  
39  
40  
41  
42  
43  
44  
45  
46  
47  
48  
49  
50  
51  
52  
53  
54  
55  
56  
57  
58  
59  
60

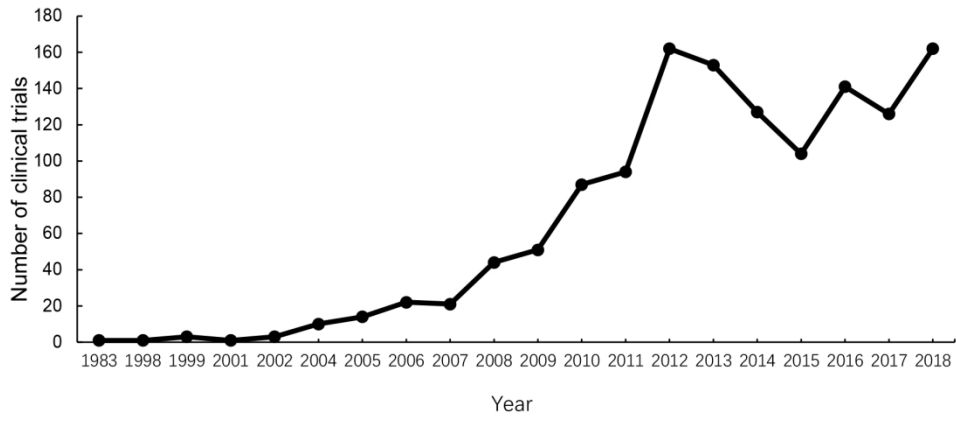

161x70mm (300 x 300 DPI)

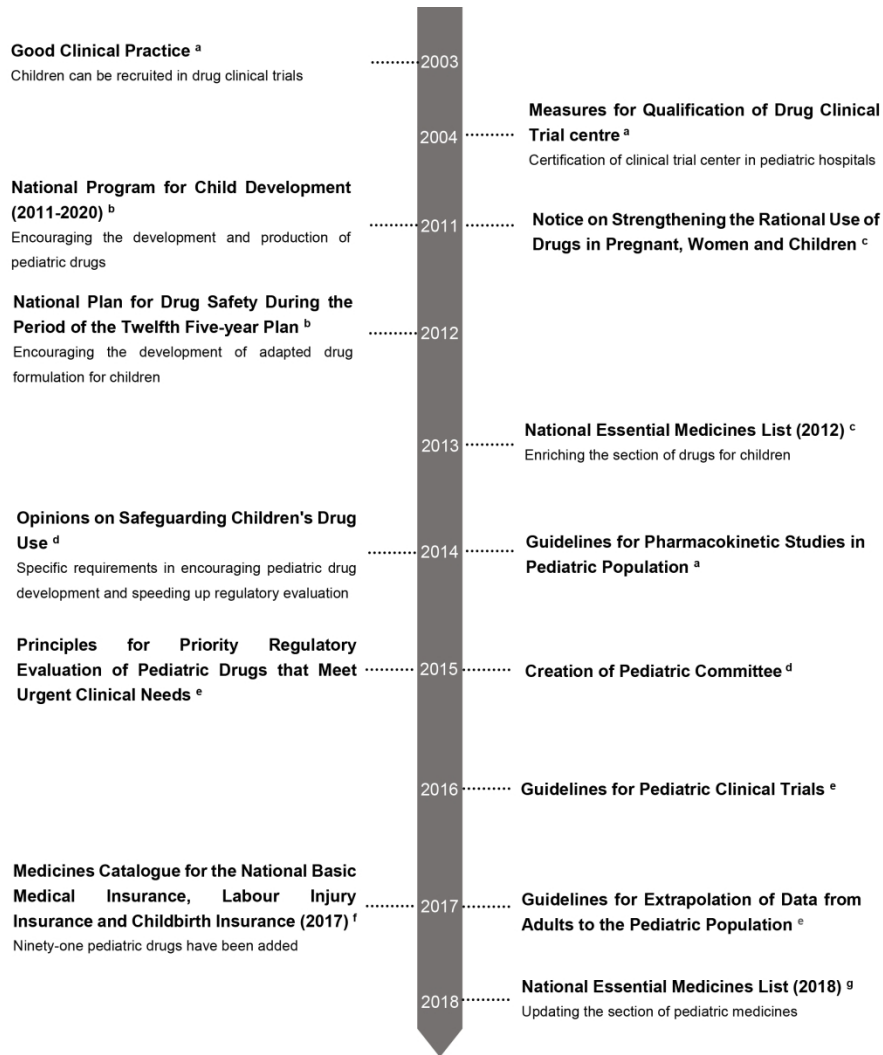

Figure 2 Policies on Clinical Trials of Pediatric Drugs in China

a: State Food and Drug Administration, SFDA (now namely National Medical Products Administration, NMPA); b: The State Council; c: Ministry of Health (now namely National Health Commission); d: National Health and Family Planning Commission, NHFPC (now namely National Health Commission); e: China Food and Drug Administration, CFDA (now namely NMPA); f: Ministry of Human Resources and Social Security; g: National Health Commission

196x262mm (300 x 300 DPI)

# BMJ Paediatrics Open

## Pediatric Drugs Trials in China

|                               |                                                                                                                                  |
|-------------------------------|----------------------------------------------------------------------------------------------------------------------------------|
| Journal:                      | <i>BMJ Paediatrics Open</i>                                                                                                      |
| Manuscript ID                 | bmjpo-2019-000618.R1                                                                                                             |
| Article Type:                 | Original research                                                                                                                |
| Date Submitted by the Author: | 18-Jan-2020                                                                                                                      |
| Complete List of Authors:     | Hao, Guo-xiang<br>Yuan, Xiao-xiao<br>Guo, Wei<br>Quan, Xi-Yu<br>Qi, Xue-Jie<br>Wang, Tian-You<br>Zhao, Wei; Shandong University, |
| Keywords:                     | Paediatric Practice, Evidence Based Medicine                                                                                     |
|                               |                                                                                                                                  |

SCHOLARONE™  
Manuscripts



I, the Submitting Author has the right to grant and does grant on behalf of all authors of the Work (as defined in the below author licence), an exclusive licence and/or a non-exclusive licence for contributions from authors who are: i) UK Crown employees; ii) where BMJ has agreed a CC-BY licence shall apply, and/or iii) in accordance with the terms applicable for US Federal Government officers or employees acting as part of their official duties; on a worldwide, perpetual, irrevocable, royalty-free basis to BMJ Publishing Group Ltd ("BMJ") its licensees and where the relevant Journal is co-owned by BMJ to the co-owners of the Journal, to publish the Work in this journal and any other BMJ products and to exploit all rights, as set out in our [licence](#).

The Submitting Author accepts and understands that any supply made under these terms is made by BMJ to the Submitting Author unless you are acting as an employee on behalf of your employer or a postgraduate student of an affiliated institution which is paying any applicable article publishing charge ("APC") for Open Access articles. Where the Submitting Author wishes to make the Work available on an Open Access basis (and intends to pay the relevant APC), the terms of reuse of such Open Access shall be governed by a Creative Commons licence – details of these licences and which [Creative Commons](#) licence will apply to this Work are set out in our licence referred to above.

Other than as permitted in any relevant BMJ Author's Self Archiving Policies, I confirm this Work has not been accepted for publication elsewhere, is not being considered for publication elsewhere and does not duplicate material already published. I confirm all authors consent to publication of this Work and authorise the granting of this licence.

# Pediatric Drugs Trials in China

**Running title:** Pediatric Clinical Trials in China

Guo-Xiang Hao<sup>1\*</sup>, Xiao-Xiao Yuan<sup>1\*</sup>, Wei Guo<sup>1</sup>, Xi-Yu Quan<sup>1</sup>, Xue-Jie Qi<sup>1</sup>,  
Tian-You Wang<sup>2,3</sup>, Wei Zhao<sup>1,4#</sup>

\* The first two authors contributed equally

1. Department of Clinical Pharmacy, School of Pharmaceutical Sciences, Shandong University, Jinan, China
2. Beijing Key Laboratory of Pediatric Hematology Oncology, National Key Discipline of Pediatrics (Capital Medical University), Key Laboratory of Major Diseases in Children, Ministry of Education
3. Hematology Oncology Center, Beijing Children's Hospital, Capital Medical University, National Center for Children's Health, Beijing, China
4. Department of Pharmacy, Shandong Provincial Qianfoshan Hospital, the First Hospital Affiliated with Shandong First Medical University, Jinan, China

Address for correspondence:

Prof Dr Wei Zhao

Department of Clinical Pharmacy, School of Pharmaceutical sciences, Shandong University, Jinan, 250012, China

Tel: 0086-531-88383308; fax: 0086-531-88383308

E-mail: zhao4wei2@hotmail.com

Manuscript: 1371 words; References: 15; Figure: 2; Table: 2.

## Abstract

### Objective

Clinical trials of children's drugs are of great significance to rational drug use in children. However, pediatric drugs trials in China are facing complex challenges. At present, the investigation data on registration status of pediatric drug trials in China is still relatively lacking, and relevant research is urgently needed.

### Methods

The advanced retrieval function is used to retrieve clinical trials data in the Clinical Trial.gov and Chinese Clinical Trial Registry databases in April 22, 2019. Fifteen key items were analyzed to describe trial characteristics, including: registration number, study start date (year), mode of funding, type of disease, medicine type, research stage, research design, sample size, number of experimental groups, placebo group, blind method, implementation center, child-specific, newborn-specific and participant age.

### Results

A total of 1388 clinical trials of pediatric drugs conducted in China were registered. The number of pediatric drug trials grew steadily over time, from less than 20 per year before 2005 to more than 100 per year after 2012. Most clinical trials were post-marketing (n=800, 57.6%), single-center (n=1045, 75.3%), intervention studies (n=1161, 83.6%) without blinded methods (1169, 84.2%) and funded by non-profit organizations (n=838, 60.4%). The number of clinical trials for antineoplastic agents (n=254, 18.3%), antiinfectives (n=156,



1  
2  
3  
4 11.3%) and vaccines (n=154, 11.1%) is the largest.  
5

## 6 **Conclusion**

7  
8  
9 Pediatric drug trials in China made a significant progress in recent years.  
10  
11 Innovative method and trial design optimization should be encouraged to  
12  
13 accelerate pediatric clinical research. Pharmaceutical companies need to be  
14  
15 further stimulated to carry out more high-quality pediatric clinical trials with  
16  
17 support of pediatric drug legislation.  
18  
19  
20  
21

22 **Key words:** Pediatrics, clinical trials, registration  
23  
24  
25  
26  
27  
28  
29  
30  
31  
32  
33  
34  
35  
36  
37  
38  
39  
40  
41  
42  
43  
44  
45  
46  
47  
48  
49  
50  
51  
52  
53  
54  
55  
56  
57  
58  
59  
60

**What is known about the subject?**

(i) Clinical trials of children's drugs are of great significance to rational drug use in children

(ii) Starting from 2003, children were formally included in the scope of clinical trials in the Good Clinical Practice (GCP) in China.

**What this study adds?**

(i) Pediatric drug trials in China made a significant progress in recent years.

(ii) Most pediatric drug trials in China were post-marketing, single-center, intervention studies without blinded methods and funded by non-profit organizations.

(iii) The number of pediatric drug trials for anti-infective drugs and blood system drugs is the largest in China.

## Introduction

The rational use of medicines in children is limited by the absence of scientific evidence and the off-label use of drugs is a critical issue in pediatric clinical practice, so the need for properly designed and conducted pediatric clinical trials has never been greater<sup>1,2</sup>. Insufficient pediatric clinical trials increase the risk of adverse drug reactions in children<sup>3</sup>. Due to the scant information on pediatric prescriptions, clinicians often prescribe unauthorized indications or dosage forms of medicines for children<sup>4,5</sup>. Adverse drug reaction (ADR) monitoring data show that compared with 6.9% in adults, the ADR rate of children in China is 12.9%, of which 24.4% of neonates. According to World Health Organization (WHO) statistics in 2010, about 7.6 million children under the age of 5 die each year due to the lack of safe and effective drugs. The improper use of pediatric medicines will not only endanger children's health, but also bring misfortune to families and heavy burden to society.

Clinical trials are the golden standard for evaluating the safety and efficacy of drugs and producing evidence-based medical evidence. Clinical trial registration is to register the important information of the trial in the open clinical trial registration institution at the initial stage of the trial, so as to provide reliable information to the public, health practitioners, researchers and sponsors, and make the design and implementation of the clinical trial transparent. Pre-trial registration helps to reduce publication bias, selection bias, improve transparency of trials and make clinical trials conducted under public

1  
2  
3  
4 supervision, which is particularly important for the development of clinical trials  
5  
6 for children<sup>6</sup>.  
7  
8

9  
10 The pediatric drugs trials in China mainly face two challenges, including the  
11 support of adaptive policies and the application of new technologies and  
12 methods. The introduction of the Pediatric Regulation by the European Union,  
13  
14 together with the renewal of the Pediatric Rule by the US Food and Drug  
15 Administration on the requirements for pediatric labeling made it mandatory for  
16  
17 sponsors to develop drugs for the pediatric population and promotes the  
18  
19 pediatric drug trials in Europe and US<sup>7 8</sup>. However, very little is known about  
20  
21 the situation of pediatric drug trials in other countries, particularly in China,  
22  
23 home to nearly 300 millions children. In order to support the global research in  
24  
25 pediatric drug development and clarify the specific Chinese characteristics of  
26  
27 pediatric drugs trials, we analyzed the pediatric drug trials registered to be  
28  
29 conducted in China.  
30  
31  
32  
33  
34  
35  
36  
37  
38  
39  
40

## 41 **Methods**

### 42 **Design**

43  
44  
45 We investigate the current status of pediatric clinical trials in China through the  
46  
47 advanced retrieval functions of the Clinical Trial.gov (CTg) and Chinese Clinical  
48  
49 Trial Registry (ChiCTR) databases. The data deadline is April 22, 2019. The  
50  
51 key words of the ChiCTR are child, infant, newborn and adolescent (in Chinese).  
52  
53 Retrieve CTg qualification is Child (birth-18). The items enrolled into the  
54  
55  
56  
57  
58  
59  
60

1  
2  
3  
4 database include: registration number, study start date (year), mode of funding,  
5  
6 type of disease, medicine type, research stage, research design, sample size,  
7  
8 number of experimental groups, placebo group, blind method, implementation  
9  
10 center, child-specific, newborn-specific and participant age.  
11  
12

### 13 14 15 **Patient and Public Involvement**

16  
17  
18 Patients or the public were not involved in the design, or conduct, or reporting,  
19  
20 or dissemination of our research.  
21  
22

### 23 24 **Results**

25  
26  
27 Among all (n=34574) Chinese clinical trials registered in the CTg and ChiCTR,  
28  
29 3368 trials (9.74%) involved the pediatric population. In CTg, the number of  
30  
31 pediatric clinical trials in China was 2526, compared with 24488 in the United  
32  
33 States. A total of 1388 clinical trials (4.01%) were pediatric drug trials, including  
34  
35 466 in CHICTR and 922 in CTg.  
36  
37  
38

39  
40  
41 In these pediatric drug trials, 547 trials were designed specifically for children  
42  
43 under the age of 18, while the other 841 trials involved both children and adults.  
44

45  
46 There are 148 clinical trials for infants (less than 1 year old), including 36 studies  
47  
48 specifically for newborns. A total of 1048 clinical trials involve the age group of  
49  
50 adolescents (from 12 to 18 years old), of which about four fifths included  
51  
52 adolescents and adults. The number of registered pediatric drugs trials in China  
53  
54 from 1983 to 2018 is shown in Figure 1.  
55  
56  
57

58  
59  
60 Most pediatric drug trials were classified as post-marketing study (n=800,

1  
2  
3  
4 57.6%), and were funded by non-profit organizations (n=838, 60.4%). The  
5  
6 industry sponsored only 437 (31.5%) trials. Around two thirds (n=924) of trials  
7  
8 were randomized and just about one eighth (n=168) involved a comparison with  
9  
10 a placebo. The majority of trials were single centre studies (n=1045, 75.3%)  
11  
12 and without blinded methods (n=1169, 84.2%). The number of interventional  
13  
14 studies (1161) far exceeds that of observational studies (227). About two-thirds  
15  
16 of clinical trials have a sample size of less than 300. The distribution of sample  
17  
18 size is shown in Table 1.  
19  
20  
21  
22  
23  
24

25 The drug classes in 1388 paediatric drug trials are shown in Table 2, among  
26  
27 which the clinical trials for antineoplastic agents, antiinfectives and vaccines are  
28  
29 the most. There were 93 pediatric drug trials including Chinese traditional  
30  
31 medicine.  
32  
33  
34  
35

## 36 Discussion

37  
38  
39 In recent years, the Chinese government has adapted drug policy for children  
40  
41 and paid more and more attention to the rational use of pediatric drugs and the  
42  
43 development of pediatric clinical trials (Figure 2). Our results demonstrated for  
44  
45 the first time the situation of pediatric drug trials in China. Consistent with the  
46  
47 initiatives of promoting pediatric drug development in Europe and US, the  
48  
49 pediatric drug trials in China made a significant progress after 2012.  
50  
51  
52  
53

54 As reported, there were fewer pediatric randomized drug trials in developing  
55  
56 countries than in developed countries in 1996-2002<sup>9</sup>. Especially in China, there  
57  
58 are few pediatric drug trials. Starting from 2003, children were formally included  
59  
60

1  
2  
3  
4 in the scope of clinical trials in the Good Clinical Practice (GCP) in China. This  
5  
6 means that, like adults, children have the right to obtain evidence-based  
7  
8 medical data for safe and effective treatment after clinical trials of new drugs  
9  
10 under ethical and strict supervision. The development of pediatric clinical trials  
11  
12 is conducive to protect children from invalid interventions. However, the  
13  
14 proportion of clinical trials registered for children in China was 9.74% in this  
15  
16 study, which was lower than that in Canada (22.4%), the United States (21.1%),  
17  
18 the United Kingdom (18.5%), Japan (18.4%) and Germany (14.5%)<sup>10</sup>. Industry-  
19  
20 sponsored trials are still limited in China and most of trials were still funded by  
21  
22 public finding. This might be one obvious reason for the lack of significant  
23  
24 increase in last few years. The adaptive pediatric drug trials legislation is  
25  
26 urgently needed in China to stimulate the enthusiasm of pharmaceutical  
27  
28 companies.

29  
30 This study shows that the proportion of observational research and  
31  
32 interventional research is about 1:5, which shows that interventional research  
33  
34 is more concerned and valued, and the content of observational research in  
35  
36 design and implementation is broader and more complex. In our study, the  
37  
38 proportion of pediatric drug trials with more than 100 participants and 500  
39  
40 participants was 61.3% and 20.9%, respectively, which is higher than 34% and  
41  
42 7% of pediatric randomized controlled drug trials published in 2007<sup>11</sup>. However,  
43  
44 single-center, non-blind research accounts for the majority of clinical trials in  
45  
46 China. At the same time, 60.1% of clinical trials recruited both adult and  
47  
48  
49  
50  
51  
52  
53  
54  
55  
56  
57  
58  
59  
60

1  
2  
3  
4 paediatric patients. Trials design needs to be further strengthened.  
5

6  
7 The proportion of trials involving infants and newborns in China is lower than  
8  
9 that in the pediatric randomized controlled drug trials published in 2007<sup>11</sup>. In  
10  
11 recent years, opportunistic sampling design, population pharmacokinetics  
12  
13 model and model-based bridging approach have provided technical support for  
14  
15 clinical trials of children's drugs<sup>12, 13, 14</sup>. China has also launched the  
16  
17 construction of a clinical evaluation technology platform for children's medicine,  
18  
19 which will enhance the overall level of clinical research on children's medicine  
20  
21 in China <sup>15</sup>. However, how to apply these techniques and methods to trials  
22  
23 design needs further exploration.  
24  
25  
26  
27  
28

29  
30 Furthermore, about one hundred trials involved Chinese traditional medicine.  
31  
32 This is a real change compared to the traditional idea, which considered  
33  
34 Chinese medicine as practical experiences. Indeed, the randomized clinical  
35  
36 trials and longer-term safety evaluation are urgently needed to develop  
37  
38 evidence-based therapy with Chinese traditional medicine in children.  
39  
40  
41  
42  
43  
44

## 45 **Conclusions**

46  
47  
48 Pediatric drug trials in China made a significant progress in recent years.  
49  
50 Innovative method and trial design optimization should be encouraged to  
51  
52 accelerate pediatric clinical research with joint efforts of regulator, scientist and  
53  
54 clinicians. Pharmaceutical companies need to be further stimulated to carry out  
55  
56 more high-quality clinical trials with support of pediatric drug legislation.  
57  
58  
59  
60



1  
2  
3  
4  
5  
6  
7 **Author Contributions:** Prof Wei Zhao had full access to all of the data in the  
8  
9 study and takes responsibility for the integrity of the data and the accuracy of  
10  
11 the data analysis. Study concept and design: Tian-You Wang, Wei Zhao;  
12  
13 Acquisition, analysis, and interpretation of data: All authors; Drafting of the  
14  
15 manuscript: Guo-Xiang Hao, Xiao-Xiao Yuan, Wei Zhao; Critical revision of the  
16  
17 manuscript: All authors. We plan to disseminate the results to study participants.  
18  
19  
20  
21

22 **Funding:** This work is supported by National Science and Technology Major  
23  
24 Projects for "Major New Drugs Innovation and Development"  
25  
26 (2017ZX09304029-002), Young Taishan Scholars Program of Shandong  
27  
28 Province, Qilu Young Scholars Program of Shandong University, National  
29  
30 Natural Science Foundation of China (81503163), Medical and Health Science  
31  
32 and Technology Development Program of Shandong Province  
33  
34 (2018WSB19010).  
35  
36  
37  
38  
39

40 **Competing interests:** None.  
41  
42  
43  
44  
45  
46  
47  
48  
49  
50  
51  
52  
53  
54  
55  
56  
57  
58  
59  
60

## References

1. Conroy S, Choonara I, Impicciatore P, et al. Survey of unlicensed and off label drug use in paediatric wards in European countries. European Network for Drug Investigation in Children. *BMJ* 2000;320(7227):79-82. doi: 10.1136/bmj.320.7227.79 [published Online First: 2000/01/22]
2. Davis JM, Connor EM, Wood AJ. The need for rigorous evidence on medication use in preterm infants: is it time for a neonatal rule? *JAMA* 2012;308(14):1435-6. doi: 10.1001/jama.2012.12883 [published Online First: 2012/10/11]
3. Gore R, Chugh P, Tripathi C, et al. Pediatric Off-Label and Unlicensed Drug Use and Its Implications. 2017;12(1):18-25.
4. Napoleone E. Children and ADRs (Adverse Drug Reactions). *Ital J Pediatr* 2010;36:4. doi: 10.1186/1824-7288-36-4 [published Online First: 2010/02/26]
5. Waisel DB. Moral responsibility to attain thorough pediatric drug labeling. *Paediatr Anaesth* 2009;19(10):989-93. doi: 10.1111/j.1460-9592.2009.03113.x [published Online First: 2009/08/08]
6. Pasquali SK, Lam WK, Chiswell K, et al. Status of the pediatric clinical trials enterprise: an analysis of the US ClinicalTrials.gov registry. *Pediatrics* 2012;130(5):e1269-77. doi: 10.1542/peds.2011-3565 [published Online First: 2012/10/03]
7. Pansieri C, Bonati M, Choonara I, et al. Neonatal drug trials: impact of EU and US paediatric regulations. *Arch Dis Child Fetal Neonatal Ed* 2014;99(5):F438. doi: 10.1136/archdischild-2013-305900 [published Online First: 2014/05/06]
8. Turner MA, Catapano M, Hirschfeld S, et al. Paediatric drug development: the impact of evolving regulations. *Adv Drug Deliv Rev* 2014;73:2-13. doi: 10.1016/j.addr.2014.02.003 [published Online First: 2014/02/22]
9. Nor Aripin KN, Sammons HM, Choonara I. Published pediatric randomized drug trials in developing countries, 1996-2002. *Paediatr Drugs* 2010;12(2):99-103. doi: 10.2165/11316260-000000000-00000 [published Online First: 2010/03/12]
10. LI J, Yan K, Kong YT, et al. A cross-sectional study of children clinical trials

- 1  
2  
3  
4 registration in the world based on ClinicalTrials. *Chin J Evid Based Pediatr*  
5 2016;11(1):3-7.  
6  
7  
8 11. Aripin KN, Choonara I, Sammons HM. A systematic review of paediatric  
9 randomised controlled drug trials published in 2007. *Arch Dis Child*  
10 2010;95(6):469-73. doi: 10.1136/adc.2009.173591 [published Online First:  
11 2010/05/27]  
12  
13  
14  
15 12. Leroux S, Turner MA, Guellec CB, et al. Pharmacokinetic Studies in Neonates: The  
16 Utility of an Opportunistic Sampling Design. *Clin Pharmacokinet*  
17 2015;54(12):1273-85. doi: 10.1007/s40262-015-0291-1 [published Online First:  
18 2015/06/13]  
19  
20  
21  
22  
23 13. Hao GX, Huang X, Zhang DF, et al. Population pharmacokinetics of tacrolimus in  
24 children with nephrotic syndrome. *Br J Clin Pharmacol* 2018;84(8):1748-56.  
25 doi: 10.1111/bcp.13605 [published Online First: 2018/04/11]  
26  
27  
28  
29 14. Zhao W, Le Guellec C, Benjamin DK, Jr., et al. First dose in neonates: are juvenile  
30 mice, adults and in vitro-in silico data predictive of neonatal pharmacokinetics  
31 of fluconazole. *Clin Pharmacokinet* 2014;53(11):1005-18. doi:  
32 10.1007/s40262-014-0169-7 [published Online First: 2014/08/27]  
33  
34  
35  
36  
37 15. Wang XL, Zhang YJ. The Progress and Prospects of Pediatric Clinical Trial in  
38 China. *Journal of Pediatric Pharmacy* 2011;17(1):15-16. doi: 10.13407/j.cnki  
39  
40  
41  
42  
43  
44  
45  
46  
47  
48  
49  
50  
51  
52  
53  
54  
55  
56  
57  
58  
59  
60

Table 1 Sample sizes in pediatric drug trials

| Sample size (participants (n)) | No. of pediatric drug trials | Proportion (%) |
|--------------------------------|------------------------------|----------------|
| 0-100                          | 538                          | 38.7           |
| 101-200                        | 264                          | 19.0           |
| 201-300                        | 144                          | 10.4           |
| 301-400                        | 90                           | 6.5            |
| 401-500                        | 54                           | 3.9            |
| 501-1000                       | 139                          | 10.0           |
| >1000                          | 151                          | 10.9           |
| Unknown                        | 8                            | 0.6            |
| Total                          | 1388                         | 100.0          |

Table 2 Classes of drugs in pediatric drug trials

| Classes                                                             | No. of trials | Proportion (%) |
|---------------------------------------------------------------------|---------------|----------------|
| Antineoplastic agents                                               | 254           | 18.3           |
| Antiinfectives                                                      | 156           | 11.2           |
| Vaccines                                                            | 154           | 11.1           |
| Anesthetics and analgesics                                          | 108           | 7.8            |
| Anticoagulants, anticoagulants and hematopoietic agents             | 87            | 6.3            |
| Immunosuppressants and glucocorticoids                              | 81            | 5.8            |
| Asthma drugs                                                        | 50            | 3.6            |
| Antihypertensive and cardiotoxic drugs                              | 46            | 3.3            |
| Dermatologicals                                                     | 42            | 3.0            |
| Vitamins, electrolyte solutions, nutrition and nutrient supplements | 36            | 2.6            |
| Antiepileptic drugs                                                 | 33            | 2.4            |
| Hormonal preparations                                               | 29            | 2.1            |
| Diabetes medication                                                 | 28            | 2.0            |
| Antipsychotics                                                      | 26            | 1.9            |
| Drugs for pulmonary hypertension                                    | 21            | 1.5            |
| Probiotic preparations                                              | 20            | 1.4            |
| Ophthalmic drugs                                                    | 20            | 1.4            |
| Drugs for nerve injury repair and nervous system development        | 20            | 1.4            |
| Others                                                              | 177           | 12.8           |
| Total                                                               | 1388          | 100.0          |

1  
2  
3  
4 **Figure legends**

5 Figure 1 The number of registered pediatric drug trials in China from 1983 to  
6  
7 2018  
8

9 Figure 2 Policies on pediatric drug trials in China  
10  
11  
12  
13  
14  
15  
16  
17  
18  
19  
20  
21  
22  
23  
24  
25  
26  
27  
28  
29  
30  
31  
32  
33  
34  
35  
36  
37  
38  
39  
40  
41  
42  
43  
44  
45  
46  
47  
48  
49  
50  
51  
52  
53  
54  
55  
56  
57  
58  
59  
60

Confidential: For Review Only

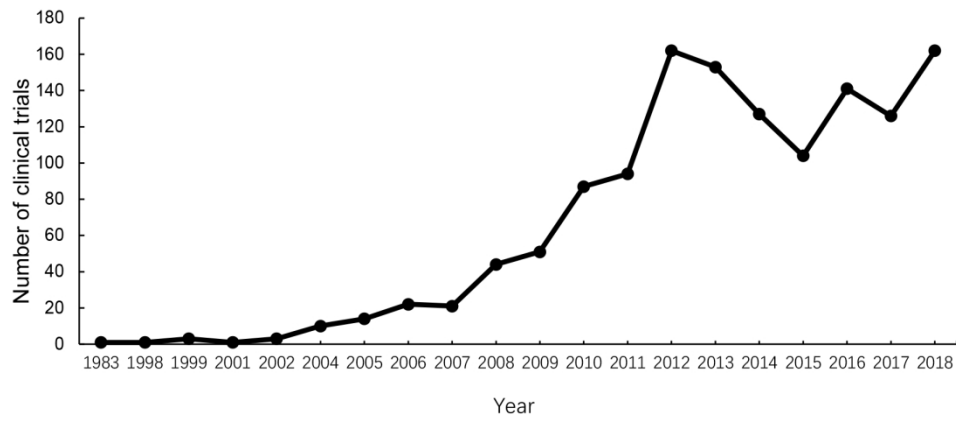

161x70mm (300 x 300 DPI)

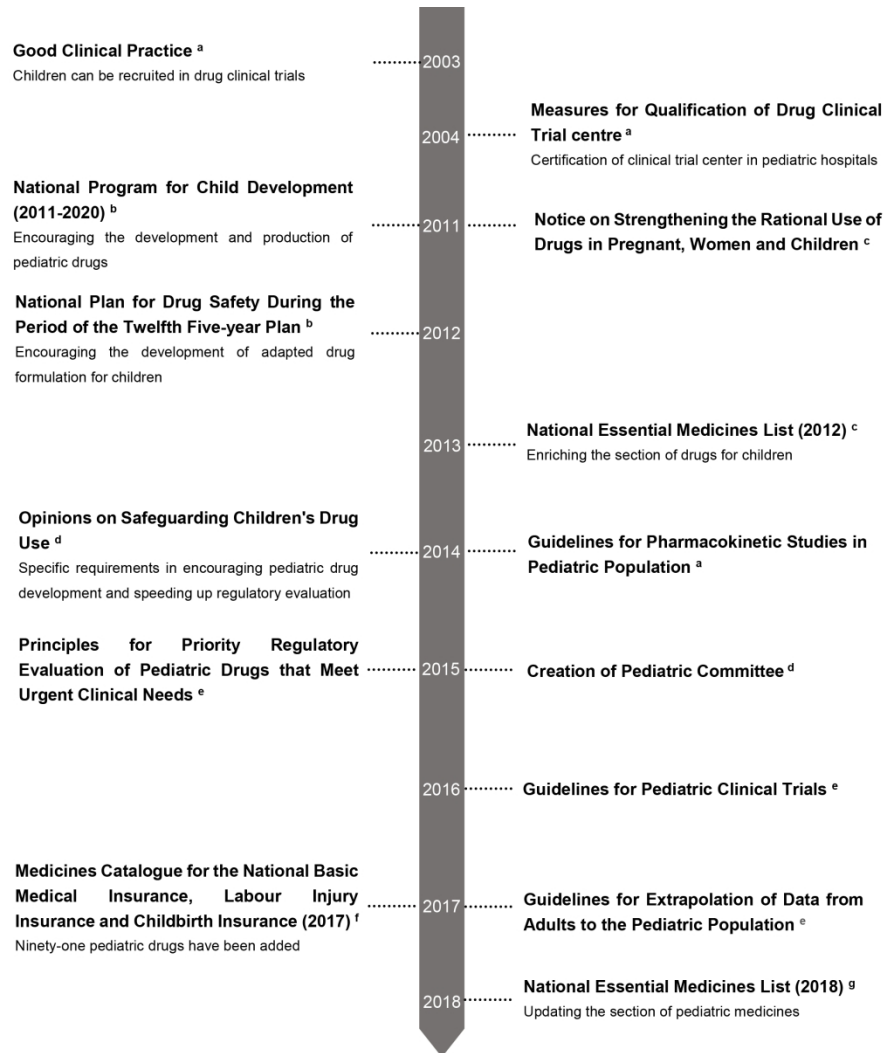

**Figure 2 Policies on Clinical Trials of Pediatric Drugs in China**

a: State Food and Drug Administration, SFDA (now namely National Medical Products Administration, NMPA); b: The State Council; c: Ministry of Health (now namely National Health Commission); d: National Health and Family Planning Commission, NHFPC (now namely National Health Commission); e: China Food and Drug Administration, CFDA (now namely NMPA); f: Ministry of Human Resources and Social Security; g: National Health Commission

196x262mm (300 x 300 DPI)
